# Supplementary material for: Mung bean (Phaseolus radiatus L.) polyphenol extract attenuates aluminum-induced cardiotoxicity through an ROS-triggered Ca2+/JNK/NF-κB signaling pathway in rats
Source: Royal Society of Chemistry journal article supplement (doi:10.1039/c6fo01817c), 2017-01-01
Supplement: c6fo01817c1.pdf [file c6fo01817c1.pdf]

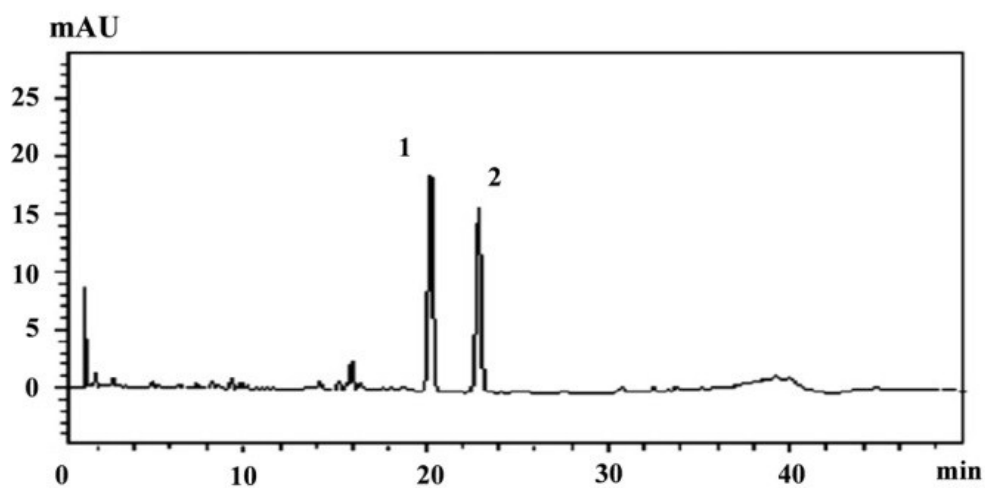

Supplementary Fig. 1. HPLC profiles of mung bean polyphenol extract ( $\lambda = 280$  nm). The peaks of compound-1 (peak 1, retention time 20.2 min) and compound-2 (peak 2, retention time 22.9 min) were recognised as vitexin and isovitexin in this paper respectively.
